# Supplementary material for: Predicted Spatial Spread of Canine Rabies in Australia
Source: PubMed Central journal article supplement (PMC5289603; doi:10.1371/journal.pntd.0005312), 2017-01-23

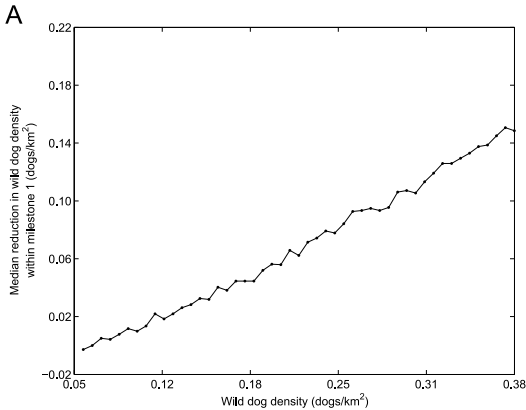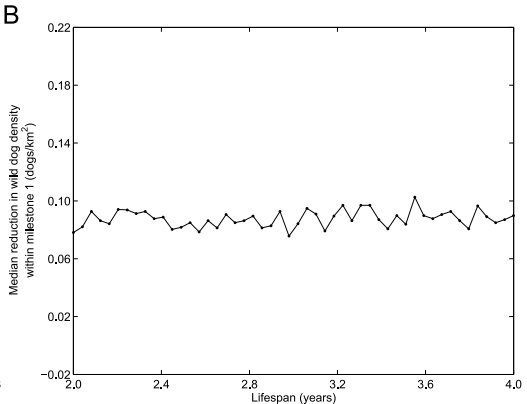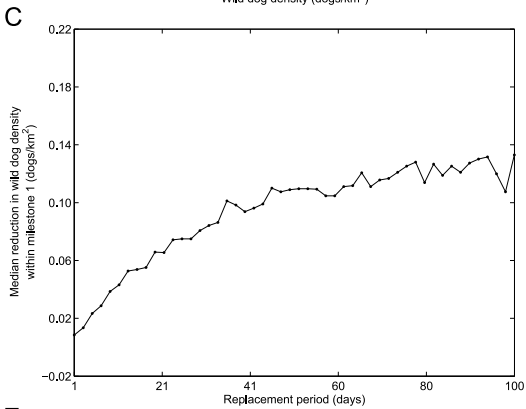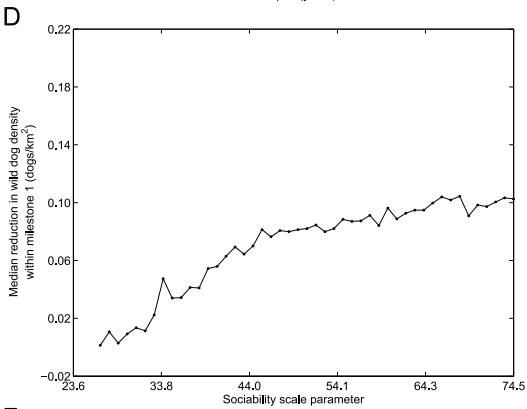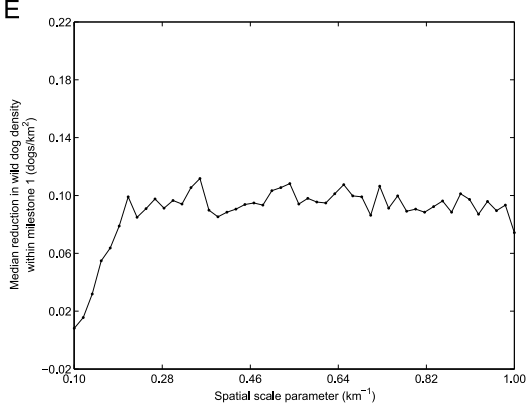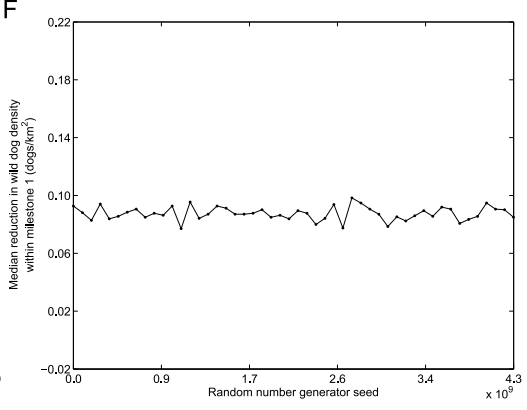

Supplement: pntd.0005312.s005.pdf [file pntd.0005312.s005.pdf]
